# Supplementary material for: Dog size and patterns of disease history across the canine age spectrum: Results from the Dog Aging Project
Source: PubMed Central journal article supplement (PMC10793924; doi:10.1371/journal.pone.0295840), 2024-01-17
Supplement: pone.0295840.s002.pdf [file pone.0295840.s002.pdf]

# Analysis using subsets of all purebred dogs

Table 1: Proportion with Disease History by Age

| Disease             | Puppy<br>(<1yr)<br>N=339 | Adolescent<br>(1 to <3yr)<br>N=2483 | Young Adult<br>(3 to <7yr)<br>N=4018 | Older Adult<br>(7 to <11yr)<br>N=3686 | Senior<br>(>=11yr)<br>N=3092 | Overall<br>N=13618 |
|---------------------|--------------------------|-------------------------------------|--------------------------------------|---------------------------------------|------------------------------|--------------------|
| Skin                | 21 (6%)                  | 416 (17%)                           | 1057 (26%)                           | 1198 (33%)                            | 1117 (36%)                   | 3809 (28%)         |
| Infection/Parasites | 76 (22%)                 | 618 (25%)                           | 1034 (26%)                           | 906 (25%)                             | 705 (23%)                    | 3339 (25%)         |
| Bone/Orthopedic     | 3 (<1%)                  | 132 (5%)                            | 434 (11%)                            | 862 (23%)                             | 1239 (40%)                   | 2670 (20%)         |
| Gastrointestinal    | 21 (6%)                  | 282 (11%)                           | 558 (14%)                            | 578 (16%)                             | 597 (19%)                    | 2036 (15%)         |
| Ocular              | 13 (4%)                  | 154 (6%)                            | 349 (9%)                             | 519 (14%)                             | 974 (32%)                    | 2009 (15%)         |
| Ear/Nose/Throat     | 11 (3%)                  | 176 (7%)                            | 415 (10%)                            | 494 (13%)                             | 828 (27%)                    | 1924 (14%)         |
| Kidney/Urinary      | 12 (4%)                  | 81 (3%)                             | 217 (5%)                             | 329 (9%)                              | 481 (16%)                    | 1120 (8%)          |
| Cancer/Tumors       | 1 (<1%)                  | 13 (<1%)                            | 87 (2%)                              | 306 (8%)                              | 464 (15%)                    | 871 (6%)           |
| Cardiac             | 0 (<1%)                  | 28 (1%)                             | 96 (2%)                              | 247 (7%)                              | 463 (15%)                    | 834 (6%)           |
| Brain/Neurologic    | 0 (<1%)                  | 11 (<1%)                            | 99 (2%)                              | 195 (5%)                              | 412 (13%)                    | 717 (5%)           |
| Liver/Pancreas      | 1 (<1%)                  | 18 (<1%)                            | 68 (2%)                              | 161 (4%)                              | 282 (9%)                     | 530 (4%)           |
| Respiratory         | 1 (<1%)                  | 35 (1%)                             | 69 (2%)                              | 136 (4%)                              | 293 (9%)                     | 534 (4%)           |
| Endocrine           | 0 (<1%)                  | 5 (<1%)                             | 45 (1%)                              | 157 (4%)                              | 261 (8%)                     | 468 (3%)           |

*Source:* Data from the Dog Aging Project for N=13618 purebred dogs included in the 2020 data release.

Table 2: Proportion with Disease History by Weight Category

| Disease             | <10kg<br>N=3200 | 10 to <20kg<br>N=2495 | 20 to <30kg<br>N=3418 | 30 to <40kg<br>N=2893 | >=40kg<br>N=1612 | Overall<br>N=13618 |
|---------------------|-----------------|-----------------------|-----------------------|-----------------------|------------------|--------------------|
| Skin                | 842 (26%)       | 645 (26%)             | 916 (27%)             | 870 (30%)             | 536 (33%)        | 3809 (28%)         |
| Infection/Parasites | 569 (18%)       | 609 (24%)             | 949 (28%)             | 773 (27%)             | 439 (27%)        | 3339 (25%)         |
| Bone/Orthopedic     | 650 (20%)       | 447 (18%)             | 585 (17%)             | 646 (22%)             | 342 (21%)        | 2670 (20%)         |
| Gastrointestinal    | 485 (15%)       | 371 (15%)             | 489 (14%)             | 426 (15%)             | 265 (16%)        | 2036 (15%)         |
| Ocular              | 647 (20%)       | 402 (16%)             | 456 (13%)             | 323 (11%)             | 181 (11%)        | 2009 (15%)         |
| Ear/Nose/Throat     | 495 (15%)       | 332 (13%)             | 402 (12%)             | 442 (15%)             | 253 (16%)        | 1924 (14%)         |
| Kidney/Urinary      | 313 (10%)       | 213 (9%)              | 279 (8%)              | 215 (7%)              | 100 (6%)         | 1120 (8%)          |
| Cancer/Tumors       | 163 (5%)        | 144 (6%)              | 243 (7%)              | 232 (8%)              | 89 (6%)          | 871 (6%)           |
| Cardiac             | 373 (12%)       | 166 (7%)              | 151 (4%)              | 102 (4%)              | 42 (3%)          | 834 (6%)           |
| Brain/Neurologic    | 233 (7%)        | 123 (5%)              | 159 (5%)              | 136 (5%)              | 66 (4%)          | 717 (5%)           |
| Liver/Pancreas      | 253 (8%)        | 94 (4%)               | 82 (2%)               | 71 (2%)               | 30 (2%)          | 530 (4%)           |
| Respiratory         | 218 (7%)        | 83 (3%)               | 98 (3%)               | 84 (3%)               | 51 (3%)          | 534 (4%)           |
| Endocrine           | 116 (4%)        | 79 (3%)               | 116 (3%)              | 106 (4%)              | 51 (3%)          | 468 (3%)           |

*Source:* Data from the Dog Aging Project for N=13618 purebred dogs included in the 2020 data release.

Table 3: Association of Age and Weight with Lifetime Prevalence (Part 1: Conditions Positively Associated with Weight from Model 1)

| Condition           | Characteristic | Model 1 <sup>a</sup> |              |         | Model 2 <sup>b</sup> |              |         | Model 3 <sup>c</sup> |              |         |
|---------------------|----------------|----------------------|--------------|---------|----------------------|--------------|---------|----------------------|--------------|---------|
|                     |                | PR                   | 95% CI       | p-value | PR                   | 95% CI       | p-value | PR                   | 95% CI       | p-value |
| Skin                | Age            | 1.32                 | (1.28, 1.35) | <0.001  | 1.32                 | (1.28, 1.35) | <0.001  | 1.29                 | (1.26, 1.33) | <0.001  |
|                     | Weight         | 1.15                 | (1.12, 1.18) | <0.001  | 1.15                 | (1.12, 1.18) | <0.001  | 1.15                 | (1.12, 1.18) | <0.001  |
|                     | Age * Weight   | -                    | -            | -       | 0.98                 | (0.96, 1.01) | 0.17    | 0.98                 | (0.96, 1.01) | 0.18    |
| Infection/Parasites | Age            | 0.98                 | (0.95, 1.01) | 0.27    | 0.99                 | (0.96, 1.02) | 0.42    | 0.98                 | (0.95, 1.01) | 0.14    |
|                     | Weight         | 1.12                 | (1.09, 1.15) | <0.001  | 1.12                 | (1.09, 1.15) | <0.001  | 1.12                 | (1.09, 1.15) | <0.001  |
|                     | Age * Weight   | -                    | -            | -       | 1.03                 | (1.00, 1.06) | 0.03    | 1.03                 | (1.00, 1.06) | 0.03    |
| Bone/Orthopedic     | Age            | 2.04                 | (1.97, 2.11) | <0.001  | 2.05                 | (1.98, 2.13) | <0.001  | 2.00                 | (1.93, 2.08) | <0.001  |
|                     | Weight         | 1.22                 | (1.18, 1.27) | <0.001  | 1.18                 | (1.13, 1.23) | <0.001  | 1.18                 | (1.14, 1.23) | <0.001  |
|                     | Age * Weight   | -                    | -            | -       | 1.07                 | (1.03, 1.11) | <0.001  | 1.07                 | (1.03, 1.11) | <0.01   |
| Gastrointestinal    | Age            | 1.22                 | (1.18, 1.27) | <0.001  | 1.22                 | (1.17, 1.27) | <0.001  | 1.21                 | (1.16, 1.26) | <0.001  |
|                     | Weight         | 1.05                 | (1.01, 1.09) | 0.03    | 1.05                 | (1.01, 1.09) | 0.02    | 1.04                 | (1.00, 1.08) | 0.06    |
|                     | Age * Weight   | -                    | -            | -       | 0.99                 | (0.95, 1.03) | 0.58    | 0.99                 | (0.95, 1.03) | 0.64    |
| Ear/Nose/Throat     | Age            | 1.74                 | (1.67, 1.82) | <0.001  | 1.72                 | (1.64, 1.79) | <0.001  | 1.70                 | (1.63, 1.78) | <0.001  |
|                     | Weight         | 1.16                 | (1.12, 1.21) | <0.001  | 1.20                 | (1.15, 1.26) | <0.001  | 1.20                 | (1.15, 1.26) | <0.001  |
|                     | Age * Weight   | -                    | -            | -       | 0.91                 | (0.87, 0.94) | <0.001  | 0.91                 | (0.87, 0.94) | <0.001  |
| Cancer/Tumors       | Age            | 2.59                 | (2.43, 2.76) | <0.001  | 2.58                 | (2.42, 2.76) | <0.001  | 2.54                 | (2.37, 2.71) | <0.001  |
|                     | Weight         | 1.37                 | (1.30, 1.45) | <0.001  | 1.30                 | (1.22, 1.39) | <0.001  | 1.32                 | (1.23, 1.41) | <0.001  |
|                     | Age * Weight   | -                    | -            | -       | 1.08                 | (1.02, 1.14) | 0.01    | 1.07                 | (1.01, 1.13) | 0.02    |
| Brain/Neurologic    | Age            | 2.57                 | (2.39, 2.77) | <0.001  | 2.61                 | (2.42, 2.83) | <0.001  | 2.61                 | (2.41, 2.83) | <0.001  |
|                     | Weight         | 1.08                 | (0.99, 1.17) | 0.07    | 1.01                 | (0.91, 1.12) | 0.83    | 1.00                 | (0.90, 1.10) | 0.96    |
|                     | Age * Weight   | -                    | -            | -       | 1.08                 | (1.00, 1.17) | 0.04    | 1.09                 | (1.01, 1.17) | 0.03    |
| Endocrine           | Age            | 2.61                 | (2.41, 2.83) | <0.001  | 2.62                 | (2.41, 2.84) | <0.001  | 2.60                 | (2.39, 2.82) | <0.001  |
|                     | Weight         | 1.27                 | (1.16, 1.38) | <0.001  | 1.24                 | (1.12, 1.36) | <0.001  | 1.23                 | (1.12, 1.35) | <0.001  |
|                     | Age * Weight   | -                    | -            | -       | 1.03                 | (0.96, 1.11) | 0.39    | 1.04                 | (0.96, 1.11) | 0.33    |

Source: Data from the Dog Aging Project for N=13618 purebred dogs included in the 2020 data release.

Note: Age (years) and Weight (kg) are standardized by subtracting their means 7, 24 and dividing by their standard deviations 4, 14.

<sup>a</sup> A model with the main effects of age and weight.

<sup>b</sup> A model with the main effects of age, weight, and the interaction.

<sup>c</sup> A model with the main effects of variables in Model 2 plus adjusted for sex and geographic region.

Table 4: Association of Age and Weight with Lifetime Prevalence (Part 2: Conditions Negatively Associated or Not Associated with Weight from Model 1).

| Condition      | Characteristic | Model 1 <sup>a</sup> |              |         | Model 2 <sup>b</sup> |              |         | Model 3 <sup>c</sup> |              |         |
|----------------|----------------|----------------------|--------------|---------|----------------------|--------------|---------|----------------------|--------------|---------|
|                |                | PR                   | 95% CI       | p-value | PR                   | 95% CI       | p-value | PR                   | 95% CI       | p-value |
| Ocular         | Age            | 1.86                 | (1.79, 1.94) | <0.001  | 1.79                 | (1.71, 1.87) | <0.001  | 1.78                 | (1.70, 1.86) | <0.001  |
|                | Weight         | 0.93                 | (0.89, 0.97) | <0.01   | 0.98                 | (0.93, 1.03) | 0.46    | 0.98                 | (0.93, 1.03) | 0.33    |
|                | Age * Weight   | -                    | -            | -       | 0.88                 | (0.85, 0.92) | <0.001  | 0.88                 | (0.85, 0.92) | <0.001  |
| Kidney/Urinary | Age            | 1.73                 | (1.64, 1.83) | <0.001  | 1.73                 | (1.63, 1.83) | <0.001  | 1.68                 | (1.59, 1.79) | <0.001  |
|                | Weight         | 1.01                 | (0.95, 1.07) | 0.71    | 1.02                 | (0.96, 1.08) | 0.59    | 1.07                 | (1.00, 1.14) | 0.04    |
|                | Age * Weight   | -                    | -            | -       | 0.98                 | (0.93, 1.04) | 0.56    | 0.95                 | (0.90, 1.01) | 0.09    |
| Cardiac        | Age            | 2.12                 | (2.00, 2.25) | <0.001  | 2.00                 | (1.86, 2.16) | <0.001  | 2.02                 | (1.87, 2.17) | <0.001  |
|                | Weight         | 0.70                 | (0.64, 0.76) | <0.001  | 0.75                 | (0.68, 0.82) | <0.001  | 0.73                 | (0.67, 0.81) | <0.001  |
|                | Age * Weight   | -                    | -            | -       | 0.90                 | (0.84, 0.97) | <0.01   | 0.91                 | (0.84, 0.98) | <0.01   |
| Liver/Pancreas | Age            | 2.00                 | (1.86, 2.16) | <0.001  | 1.94                 | (1.78, 2.12) | <0.001  | 1.91                 | (1.74, 2.09) | <0.001  |
|                | Weight         | 0.69                 | (0.62, 0.77) | <0.001  | 0.71                 | (0.63, 0.81) | <0.001  | 0.72                 | (0.63, 0.81) | <0.001  |
|                | Age * Weight   | -                    | -            | -       | 0.94                 | (0.86, 1.04) | 0.22    | 0.94                 | (0.85, 1.03) | 0.17    |
| Respiratory    | Age            | 2.06                 | (1.89, 2.24) | <0.001  | 2.14                 | (1.95, 2.35) | <0.001  | 2.13                 | (1.94, 2.34) | <0.001  |
|                | Weight         | 0.86                 | (0.78, 0.96) | <0.01   | 0.81                 | (0.71, 0.92) | <0.01   | 0.80                 | (0.70, 0.91) | <0.001  |
|                | Age * Weight   | -                    | -            | -       | 1.11                 | (1.00, 1.23) | 0.05    | 1.11                 | (1.00, 1.23) | 0.04    |

*Source:* Data from the Dog Aging Project for N=13618 purebred dogs included in the 2020 data release.

*Note:* Age (years) and Weight (kg) are standardized by subtracting their means 7, 24 and dividing by their standard deviations 4, 14.

<sup>a</sup> A model with the main effects of age and weight.

<sup>b</sup> A model with the main effects of age, weight, and the interaction.

<sup>c</sup> A model with the main effects of variables in Model 2 plus adjusted for sex and geographic region.

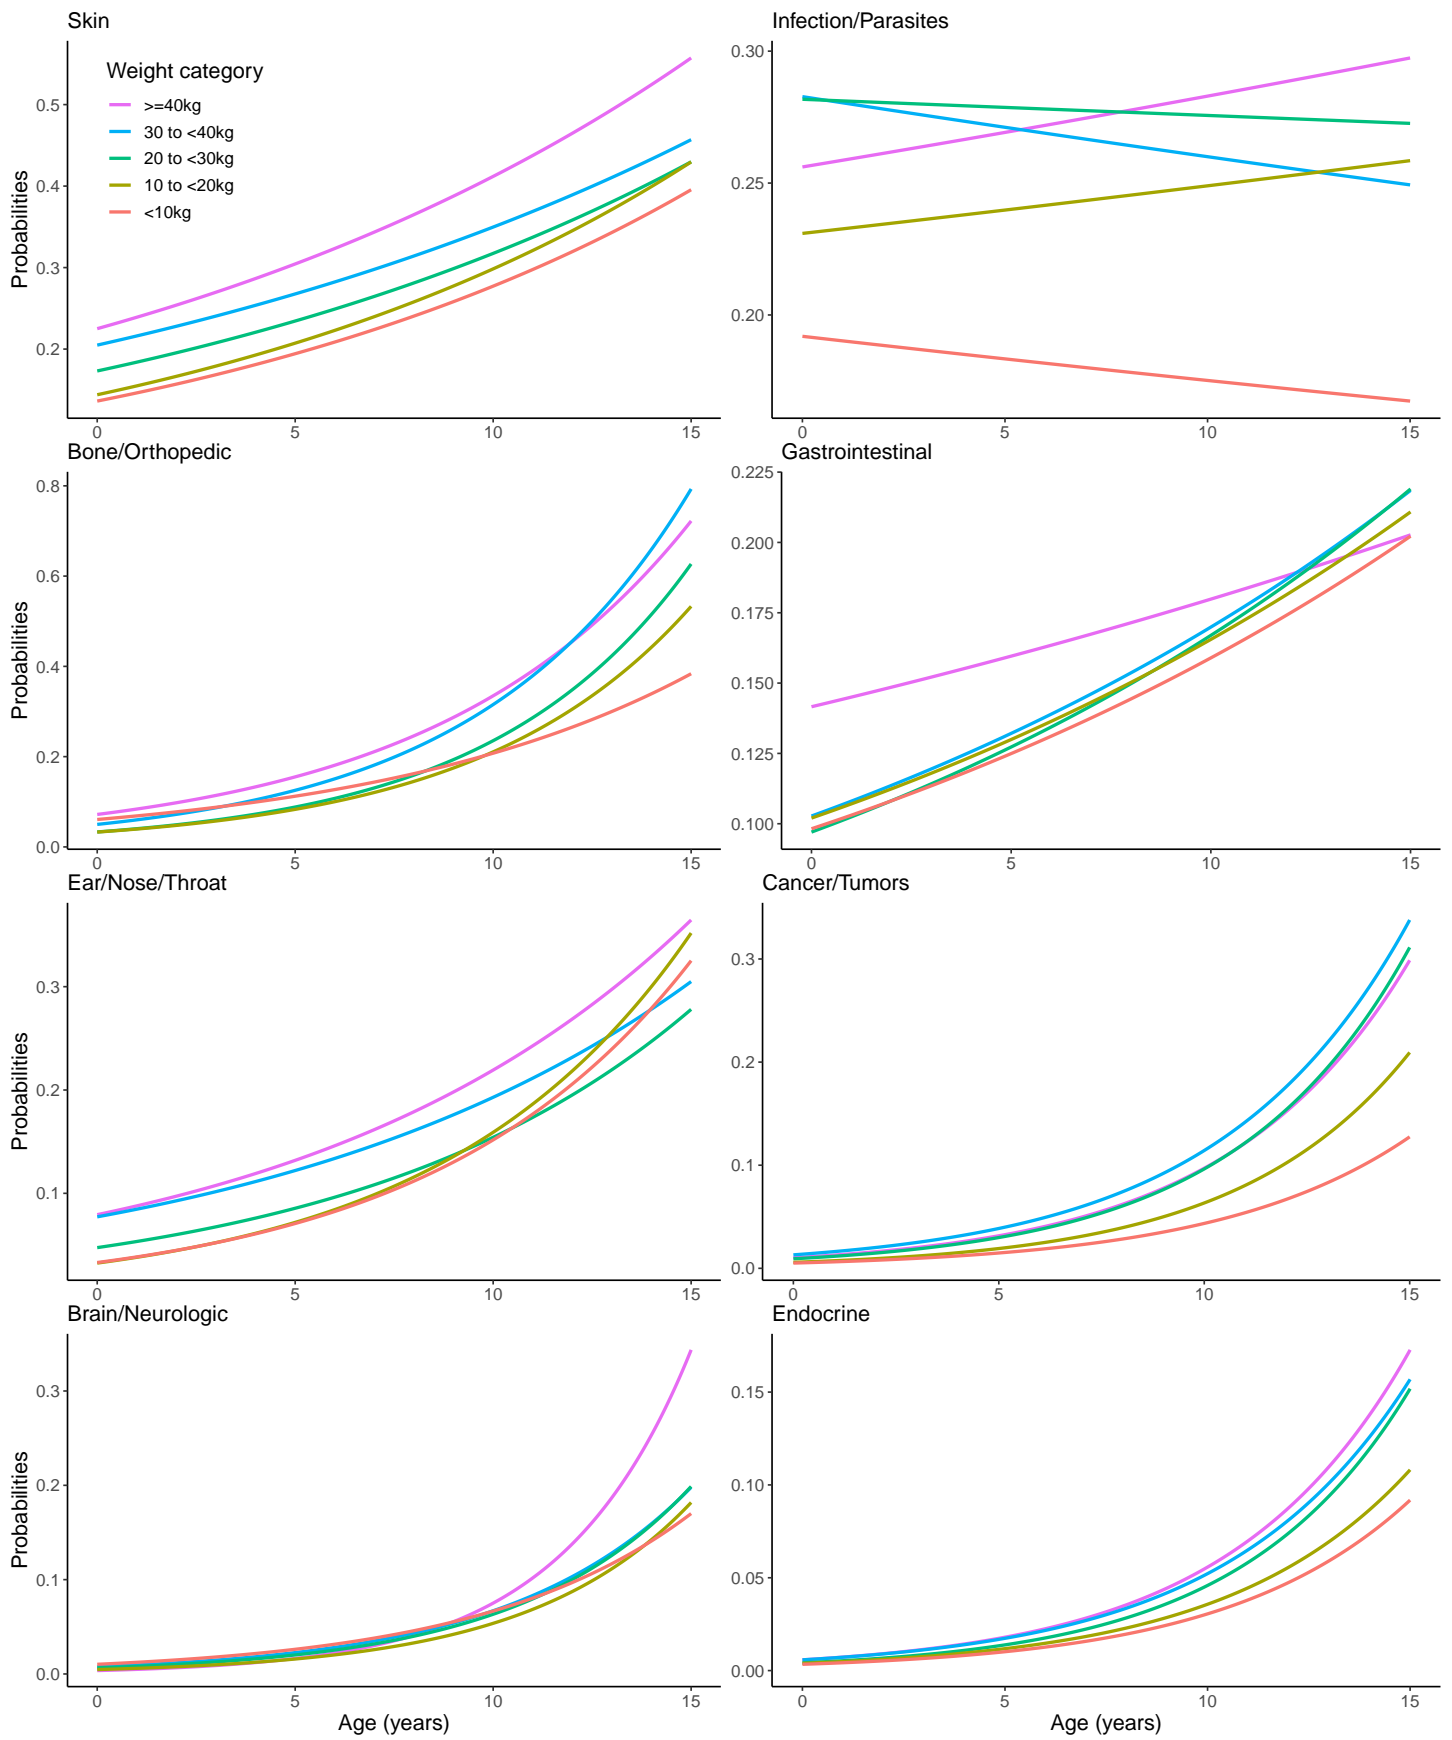

Figure 1: Results from Model 2 with Continuous Age by Weight Category (Part 1: Conditions Positively Associated with Weight from Model 1): Data from the Dog Aging Project for N=13618 purebred dogs included in the 2020 data release.

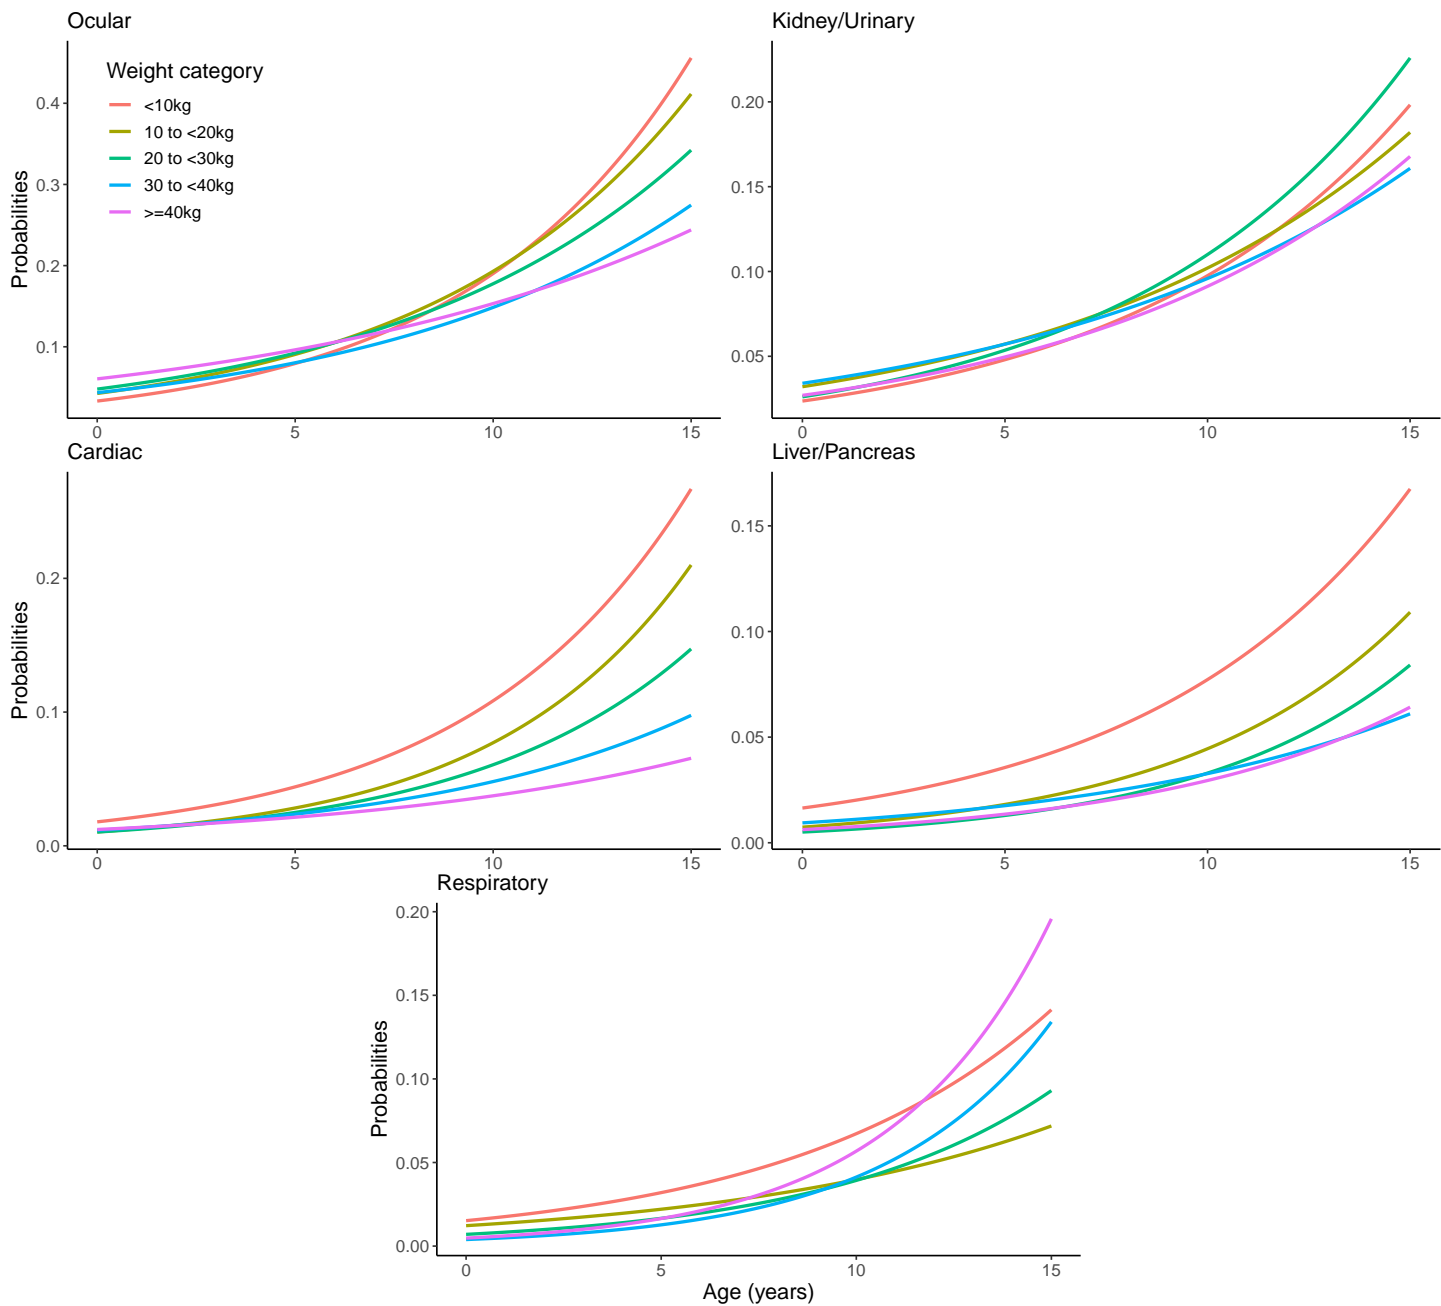

Figure 2: Results from Model 2 with Continuous Age by Weight Category (Part 2: Conditions Negatively Associated or Not Associated with Weight from Model 1): Data from the Dog Aging Project for N=13618 purebred dogs included in the 2020 data release.
