# Supplementary material for: Dog size and patterns of disease history across the canine age spectrum: Results from the Dog Aging Project
Source: PubMed Central journal article supplement (PMC10793924; doi:10.1371/journal.pone.0295840), 2024-01-17
Supplement: pone.0295840.s003.pdf [file pone.0295840.s003.pdf]

# Analysis using subsets of all mixed breed dogs

Table 1: Proportion with Disease History by Age

| Disease             | Puppy<br>(<1yr)<br>N=252 | Adolescent<br>(1 to <3yr)<br>N=2139 | Young Adult<br>(3 to <7yr)<br>N=4231 | Older Adult<br>(7 to <11yr)<br>N=3980 | Senior<br>(>=11yr)<br>N=3321 | Overall<br>N=13923 |
|---------------------|--------------------------|-------------------------------------|--------------------------------------|---------------------------------------|------------------------------|--------------------|
| Skin                | 19 (8%)                  | 380 (18%)                           | 1124 (27%)                           | 1358 (34%)                            | 1225 (37%)                   | 4106 (29%)         |
| Infection/Parasites | 71 (28%)                 | 651 (30%)                           | 1257 (30%)                           | 1103 (28%)                            | 918 (28%)                    | 4000 (29%)         |
| Bone/Orthopedic     | 4 (2%)                   | 107 (5%)                            | 415 (10%)                            | 837 (21%)                             | 1254 (38%)                   | 2617 (19%)         |
| Gastrointestinal    | 18 (7%)                  | 206 (10%)                           | 501 (12%)                            | 580 (15%)                             | 573 (17%)                    | 1878 (13%)         |
| Ocular              | 18 (7%)                  | 129 (6%)                            | 237 (6%)                             | 387 (10%)                             | 845 (25%)                    | 1616 (12%)         |
| Ear/Nose/Throat     | 8 (3%)                   | 126 (6%)                            | 330 (8%)                             | 422 (11%)                             | 759 (23%)                    | 1645 (12%)         |
| Kidney/Urinary      | 2 (<1%)                  | 72 (3%)                             | 189 (4%)                             | 262 (7%)                              | 476 (14%)                    | 1001 (7%)          |
| Cancer/Tumors       | 0 (<1%)                  | 8 (<1%)                             | 90 (2%)                              | 280 (7%)                              | 502 (15%)                    | 880 (6%)           |
| Cardiac             | 3 (1%)                   | 17 (<1%)                            | 71 (2%)                              | 193 (5%)                              | 449 (14%)                    | 733 (5%)           |
| Brain/Neurologic    | 2 (<1%)                  | 14 (<1%)                            | 89 (2%)                              | 164 (4%)                              | 338 (10%)                    | 607 (4%)           |
| Liver/Pancreas      | 1 (<1%)                  | 6 (<1%)                             | 57 (1%)                              | 116 (3%)                              | 260 (8%)                     | 440 (3%)           |
| Respiratory         | 3 (1%)                   | 18 (<1%)                            | 63 (1%)                              | 106 (3%)                              | 226 (7%)                     | 416 (3%)           |
| Endocrine           | 0 (<1%)                  | 3 (<1%)                             | 32 (<1%)                             | 153 (4%)                              | 257 (8%)                     | 445 (3%)           |

*Source:* Data from the Dog Aging Project for N=13923 mixed breed dogs included in the 2020 data release.

Table 2: Proportion with Disease History by Weight Category

| Disease             | <10kg<br>N=3007 | 10 to <20kg<br>N=3118 | 20 to <30kg<br>N=4801 | 30 to <40kg<br>N=2274 | >=40kg<br>N=723 | Overall<br>N=13923 |
|---------------------|-----------------|-----------------------|-----------------------|-----------------------|-----------------|--------------------|
| Skin                | 786 (26%)       | 886 (28%)             | 1453 (30%)            | 751 (33%)             | 230 (32%)       | 4106 (29%)         |
| Infection/Parasites | 617 (21%)       | 984 (32%)             | 1492 (31%)            | 705 (31%)             | 202 (28%)       | 4000 (29%)         |
| Bone/Orthopedic     | 537 (18%)       | 484 (16%)             | 876 (18%)             | 535 (24%)             | 185 (26%)       | 2617 (19%)         |
| Gastrointestinal    | 407 (14%)       | 415 (13%)             | 630 (13%)             | 323 (14%)             | 103 (14%)       | 1878 (13%)         |
| Ocular              | 432 (14%)       | 398 (13%)             | 478 (10%)             | 248 (11%)             | 60 (8%)         | 1616 (12%)         |
| Ear/Nose/Throat     | 332 (11%)       | 381 (12%)             | 513 (11%)             | 310 (14%)             | 109 (15%)       | 1645 (12%)         |
| Kidney/Urinary      | 217 (7%)        | 239 (8%)              | 360 (7%)              | 154 (7%)              | 31 (4%)         | 1001 (7%)          |
| Cancer/Tumors       | 110 (4%)        | 183 (6%)              | 322 (7%)              | 196 (9%)              | 69 (10%)        | 880 (6%)           |
| Cardiac             | 298 (10%)       | 196 (6%)              | 150 (3%)              | 75 (3%)               | 14 (2%)         | 733 (5%)           |
| Brain/Neurologic    | 129 (4%)        | 155 (5%)              | 187 (4%)              | 99 (4%)               | 37 (5%)         | 607 (4%)           |
| Liver/Pancreas      | 140 (5%)        | 115 (4%)              | 113 (2%)              | 59 (3%)               | 13 (2%)         | 440 (3%)           |
| Respiratory         | 167 (6%)        | 86 (3%)               | 109 (2%)              | 40 (2%)               | 14 (2%)         | 416 (3%)           |
| Endocrine           | 78 (3%)         | 111 (4%)              | 148 (3%)              | 70 (3%)               | 38 (5%)         | 445 (3%)           |

*Source:* Data from the Dog Aging Project for N=13923 mixed breed dogs included in the 2020 data release.

Table 3: Association of Age and Weight with Lifetime Prevalence (Part 1: Conditions Positively Associated with Weight from Model 1)

| Condition           | Characteristic | Model 1 <sup>a</sup> |              |         | Model 2 <sup>b</sup> |              |         | Model 3 <sup>c</sup> |              |         |
|---------------------|----------------|----------------------|--------------|---------|----------------------|--------------|---------|----------------------|--------------|---------|
|                     |                | PR                   | 95% CI       | p-value | PR                   | 95% CI       | p-value | PR                   | 95% CI       | p-value |
| Skin                | Age            | 1.27                 | (1.24, 1.30) | <0.001  | 1.26                 | (1.23, 1.29) | <0.001  | 1.25                 | (1.22, 1.29) | <0.001  |
|                     | Weight         | 1.10                 | (1.07, 1.13) | <0.001  | 1.11                 | (1.08, 1.13) | <0.001  | 1.10                 | (1.08, 1.13) | <0.001  |
|                     | Age * Weight   | -                    | -            | -       | 0.97                 | (0.95, 0.99) | 0.01    | 0.97                 | (0.95, 0.99) | 0.02    |
| Infection/Parasites | Age            | 0.96                 | (0.93, 0.98) | <0.01   | 0.96                 | (0.93, 0.98) | <0.01   | 0.95                 | (0.93, 0.98) | <0.001  |
|                     | Weight         | 1.09                 | (1.07, 1.12) | <0.001  | 1.10                 | (1.07, 1.12) | <0.001  | 1.09                 | (1.07, 1.12) | <0.001  |
|                     | Age * Weight   | -                    | -            | -       | 1.04                 | (1.01, 1.06) | <0.01   | 1.04                 | (1.01, 1.07) | <0.01   |
| Bone/Orthopedic     | Age            | 1.95                 | (1.89, 2.02) | <0.001  | 1.95                 | (1.89, 2.02) | <0.001  | 1.94                 | (1.88, 2.01) | <0.001  |
|                     | Weight         | 1.21                 | (1.17, 1.25) | <0.001  | 1.14                 | (1.09, 1.20) | <0.001  | 1.14                 | (1.09, 1.20) | <0.001  |
|                     | Age * Weight   | -                    | -            | -       | 1.10                 | (1.06, 1.14) | <0.001  | 1.10                 | (1.06, 1.15) | <0.001  |
| Gastrointestinal    | Age            | 1.23                 | (1.18, 1.28) | <0.001  | 1.22                 | (1.17, 1.27) | <0.001  | 1.21                 | (1.17, 1.27) | <0.001  |
|                     | Weight         | 1.01                 | (0.97, 1.06) | 0.54    | 1.02                 | (0.97, 1.06) | 0.47    | 1.01                 | (0.97, 1.05) | 0.72    |
|                     | Age * Weight   | -                    | -            | -       | 0.99                 | (0.95, 1.03) | 0.54    | 0.99                 | (0.95, 1.03) | 0.61    |
| Ear/Nose/Throat     | Age            | 1.78                 | (1.70, 1.87) | <0.001  | 1.77                 | (1.68, 1.85) | <0.001  | 1.76                 | (1.68, 1.85) | <0.001  |
|                     | Weight         | 1.13                 | (1.08, 1.18) | <0.001  | 1.20                 | (1.14, 1.26) | <0.001  | 1.20                 | (1.14, 1.26) | <0.001  |
|                     | Age * Weight   | -                    | -            | -       | 0.88                 | (0.85, 0.92) | <0.001  | 0.88                 | (0.85, 0.92) | <0.001  |
| Cancer/Tumors       | Age            | 2.51                 | (2.37, 2.67) | <0.001  | 2.50                 | (2.35, 2.65) | <0.001  | 2.50                 | (2.36, 2.66) | <0.001  |
|                     | Weight         | 1.44                 | (1.36, 1.52) | <0.001  | 1.38                 | (1.29, 1.48) | <0.001  | 1.39                 | (1.30, 1.49) | <0.001  |
|                     | Age * Weight   | -                    | -            | -       | 1.05                 | (1.00, 1.11) | 0.07    | 1.05                 | (1.00, 1.12) | 0.07    |
| Brain/Neurologic    | Age            | 2.34                 | (2.16, 2.53) | <0.001  | 2.35                 | (2.17, 2.55) | <0.001  | 2.37                 | (2.19, 2.57) | <0.001  |
|                     | Weight         | 1.10                 | (1.02, 1.19) | 0.02    | 1.07                 | (0.95, 1.19) | 0.26    | 1.05                 | (0.94, 1.17) | 0.39    |
|                     | Age * Weight   | -                    | -            | -       | 1.04                 | (0.95, 1.13) | 0.37    | 1.05                 | (0.97, 1.14) | 0.25    |
| Endocrine           | Age            | 2.58                 | (2.39, 2.79) | <0.001  | 2.58                 | (2.38, 2.79) | <0.001  | 2.59                 | (2.39, 2.80) | <0.001  |
|                     | Weight         | 1.27                 | (1.16, 1.38) | <0.001  | 1.28                 | (1.16, 1.43) | <0.001  | 1.27                 | (1.15, 1.41) | <0.001  |
|                     | Age * Weight   | -                    | -            | -       | 0.98                 | (0.91, 1.06) | 0.63    | 0.99                 | (0.92, 1.06) | 0.75    |

*Source:* Data from the Dog Aging Project for N=13923 mixed breed dogs included in the 2020 data release.

*Note:* Age (years) and Weight (kg) are standardized by subtracting their means 7, 21 and dividing by their standard deviations 4, 11.

<sup>a</sup> A model with the main effects of age and weight.

<sup>b</sup> A model with the main effects of age, weight, and the interaction.

<sup>c</sup> A model with the main effects of variables in Model 2 plus adjusted for sex and geographic region.

Table 4: Association of Age and Weight with Lifetime Prevalence (Part 2: Conditions Negatively Associated or Not Associated with Weight from Model 1).

| Condition      | Characteristic | Model 1 <sup>a</sup> |              |         | Model 2 <sup>b</sup> |              |         | Model 3 <sup>c</sup> |              |         |
|----------------|----------------|----------------------|--------------|---------|----------------------|--------------|---------|----------------------|--------------|---------|
|                |                | PR                   | 95% CI       | p-value | PR                   | 95% CI       | p-value | PR                   | 95% CI       | p-value |
| Ocular         | Age            | 1.86                 | (1.78, 1.95) | <0.001  | 1.83                 | (1.75, 1.93) | <0.001  | 1.84                 | (1.75, 1.93) | <0.001  |
|                | Weight         | 0.91                 | (0.87, 0.96) | <0.001  | 0.95                 | (0.89, 1.00) | 0.05    | 0.94                 | (0.89, 1.00) | 0.04    |
|                | Age * Weight   | -                    | -            | -       | 0.94                 | (0.90, 0.99) | 0.01    | 0.94                 | (0.90, 0.99) | 0.01    |
| Kidney/Urinary | Age            | 1.80                 | (1.70, 1.90) | <0.001  | 1.78                 | (1.68, 1.89) | <0.001  | 1.76                 | (1.65, 1.86) | <0.001  |
|                | Weight         | 0.99                 | (0.93, 1.04) | 0.62    | 1.01                 | (0.95, 1.07) | 0.74    | 1.07                 | (1.00, 1.15) | 0.04    |
|                | Age * Weight   | -                    | -            | -       | 0.96                 | (0.91, 1.01) | 0.10    | 0.93                 | (0.88, 0.98) | 0.01    |
| Cardiac        | Age            | 2.29                 | (2.15, 2.44) | <0.001  | 2.27                 | (2.09, 2.46) | <0.001  | 2.28                 | (2.10, 2.47) | <0.001  |
|                | Weight         | 0.63                 | (0.58, 0.69) | <0.001  | 0.64                 | (0.58, 0.71) | <0.001  | 0.64                 | (0.57, 0.71) | <0.001  |
|                | Age * Weight   | -                    | -            | -       | 0.98                 | (0.91, 1.07) | 0.68    | 0.99                 | (0.91, 1.08) | 0.86    |
| Liver/Pancreas | Age            | 2.25                 | (2.07, 2.44) | <0.001  | 2.34                 | (2.14, 2.56) | <0.001  | 2.34                 | (2.14, 2.57) | <0.001  |
|                | Weight         | 0.82                 | (0.74, 0.91) | <0.001  | 0.75                 | (0.66, 0.86) | <0.001  | 0.76                 | (0.66, 0.86) | <0.001  |
|                | Age * Weight   | -                    | -            | -       | 1.11                 | (1.01, 1.23) | 0.03    | 1.12                 | (1.02, 1.24) | 0.02    |
| Respiratory    | Age            | 1.98                 | (1.81, 2.17) | <0.001  | 1.97                 | (1.75, 2.21) | <0.001  | 1.97                 | (1.76, 2.22) | <0.001  |
|                | Weight         | 0.71                 | (0.63, 0.80) | <0.001  | 0.71                 | (0.62, 0.82) | <0.001  | 0.71                 | (0.62, 0.82) | <0.001  |
|                | Age * Weight   | -                    | -            | -       | 0.99                 | (0.88, 1.12) | 0.88    | 1.00                 | (0.88, 1.13) | 0.98    |

*Source:* Data from the Dog Aging Project for N=13923 mixed breed dogs included in the 2020 data release.

*Note:* Age (years) and Weight (kg) are standardized by subtracting their means 7, 21 and dividing by their standard deviations 4, 11.

<sup>a</sup> A model with the main effects of age and weight.

<sup>b</sup> A model with the main effects of age, weight, and the interaction.

<sup>c</sup> A model with the main effects of variables in Model 2 plus adjusted for sex and geographic region.

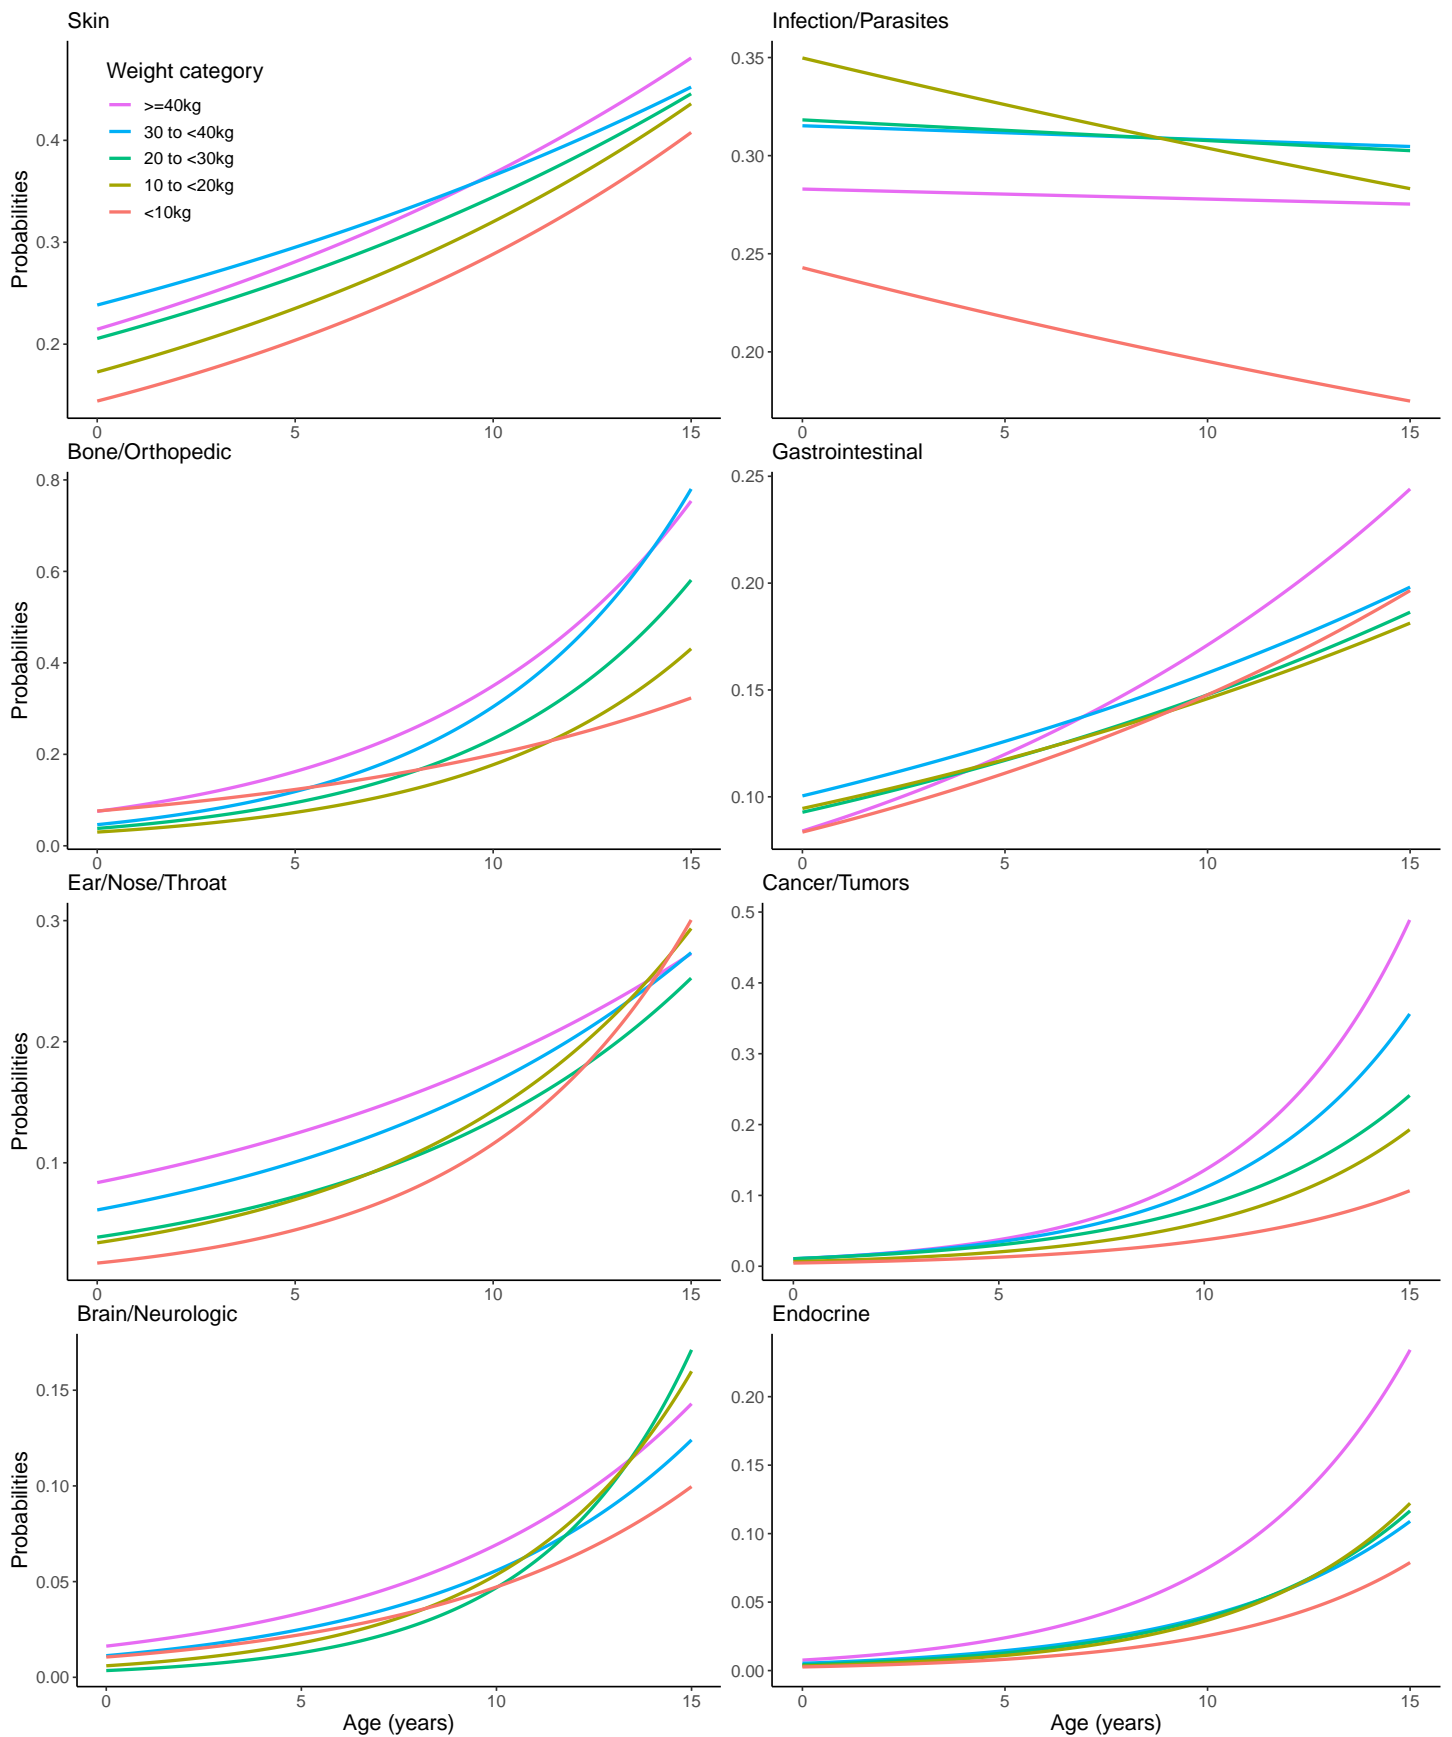

Figure 1: Results from Model 2 with Continuous Age by Weight Category (Part 1: Conditions Positively Associated with Weight from Model 1): Data from the Dog Aging Project for N=13923 mixed breed dogs included in the 2020 data release.

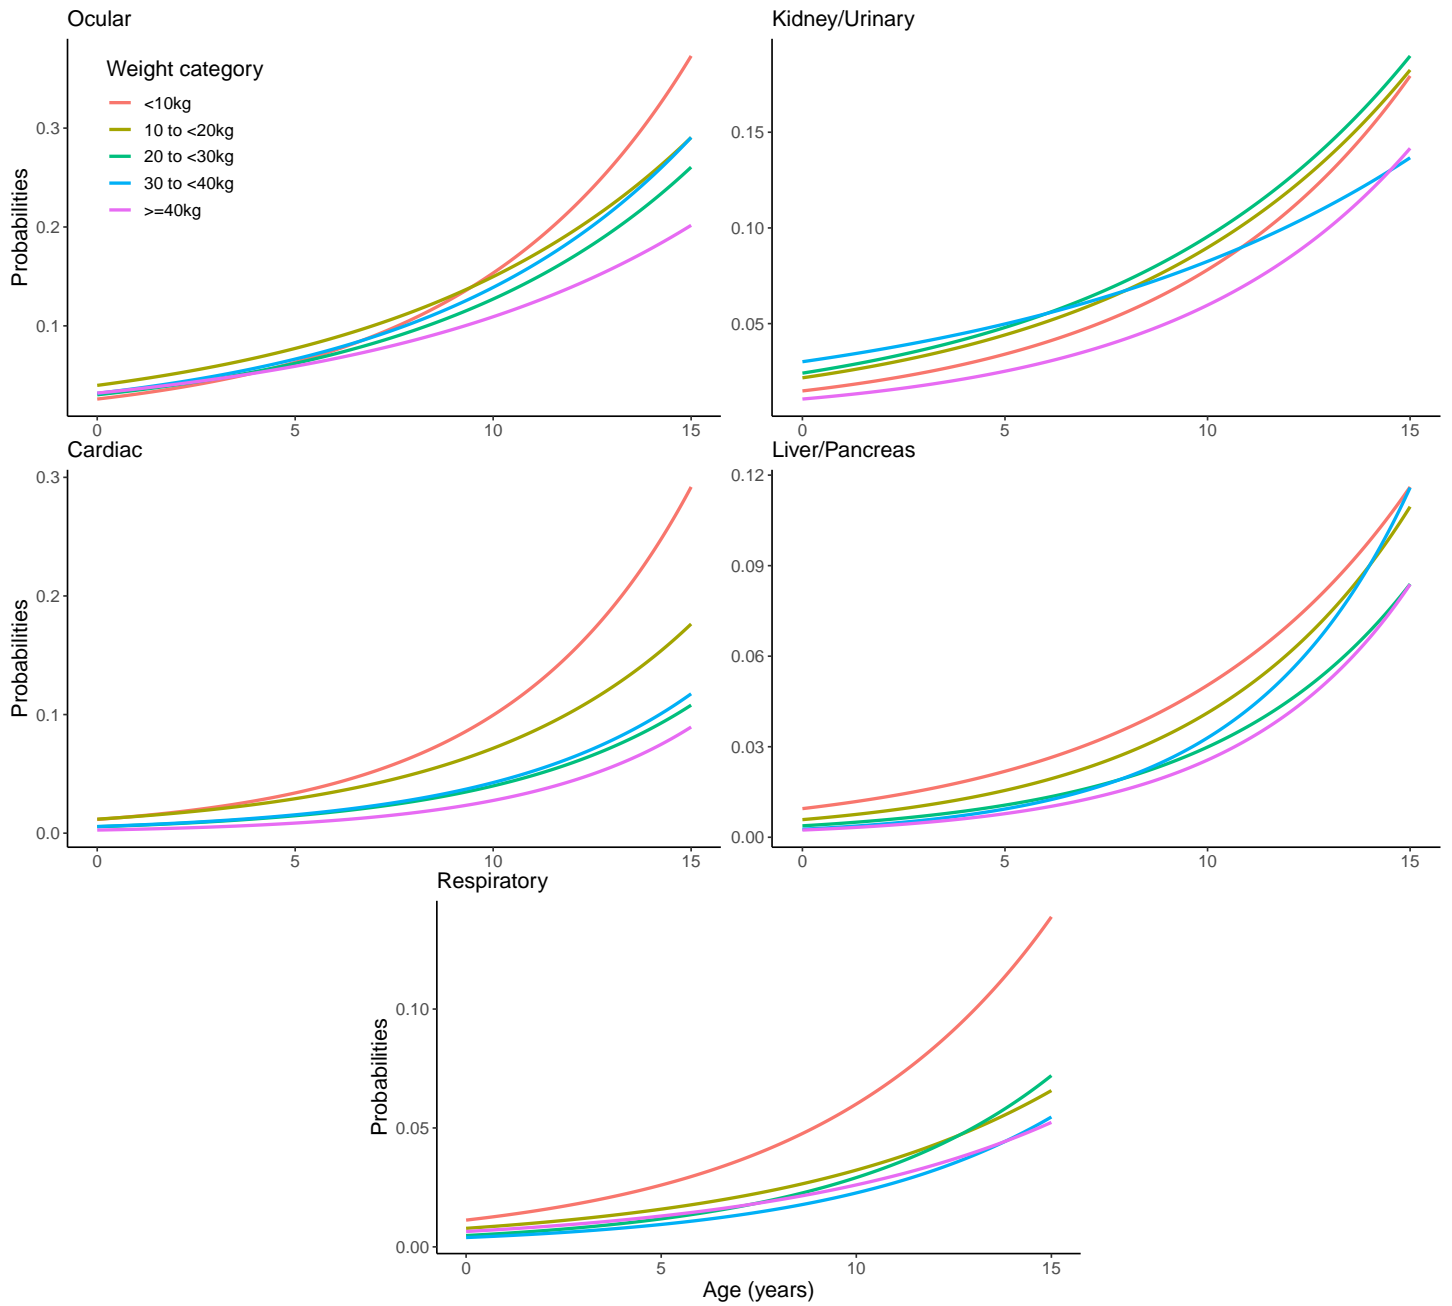

Figure 2: Results from Model 2 with Continuous Age by Weight Category (Part 2: Conditions Negatively Associated or Not Associated with Weight from Model 1): Data from the Dog Aging Project for N=13923 mixed breed dogs included in the 2020 data release.
